# Supplementary material for: Q40 sequencing reduces costs and enhances detection of low- frequency somatic variants
Source: Research Square preprint supplement (doi:10.21203/rs.3.rs-7283107/v1), 2025-09-23
Supplement: Supplementary file 1 [file 60a5fd104f3de2ee190a199b.docx]

## **Supplementary Figures**

**Figure S1. Extended analysis of germline variant calling performance for sample RM8398 and reproducibility (Q30 *vs.* Q40).**


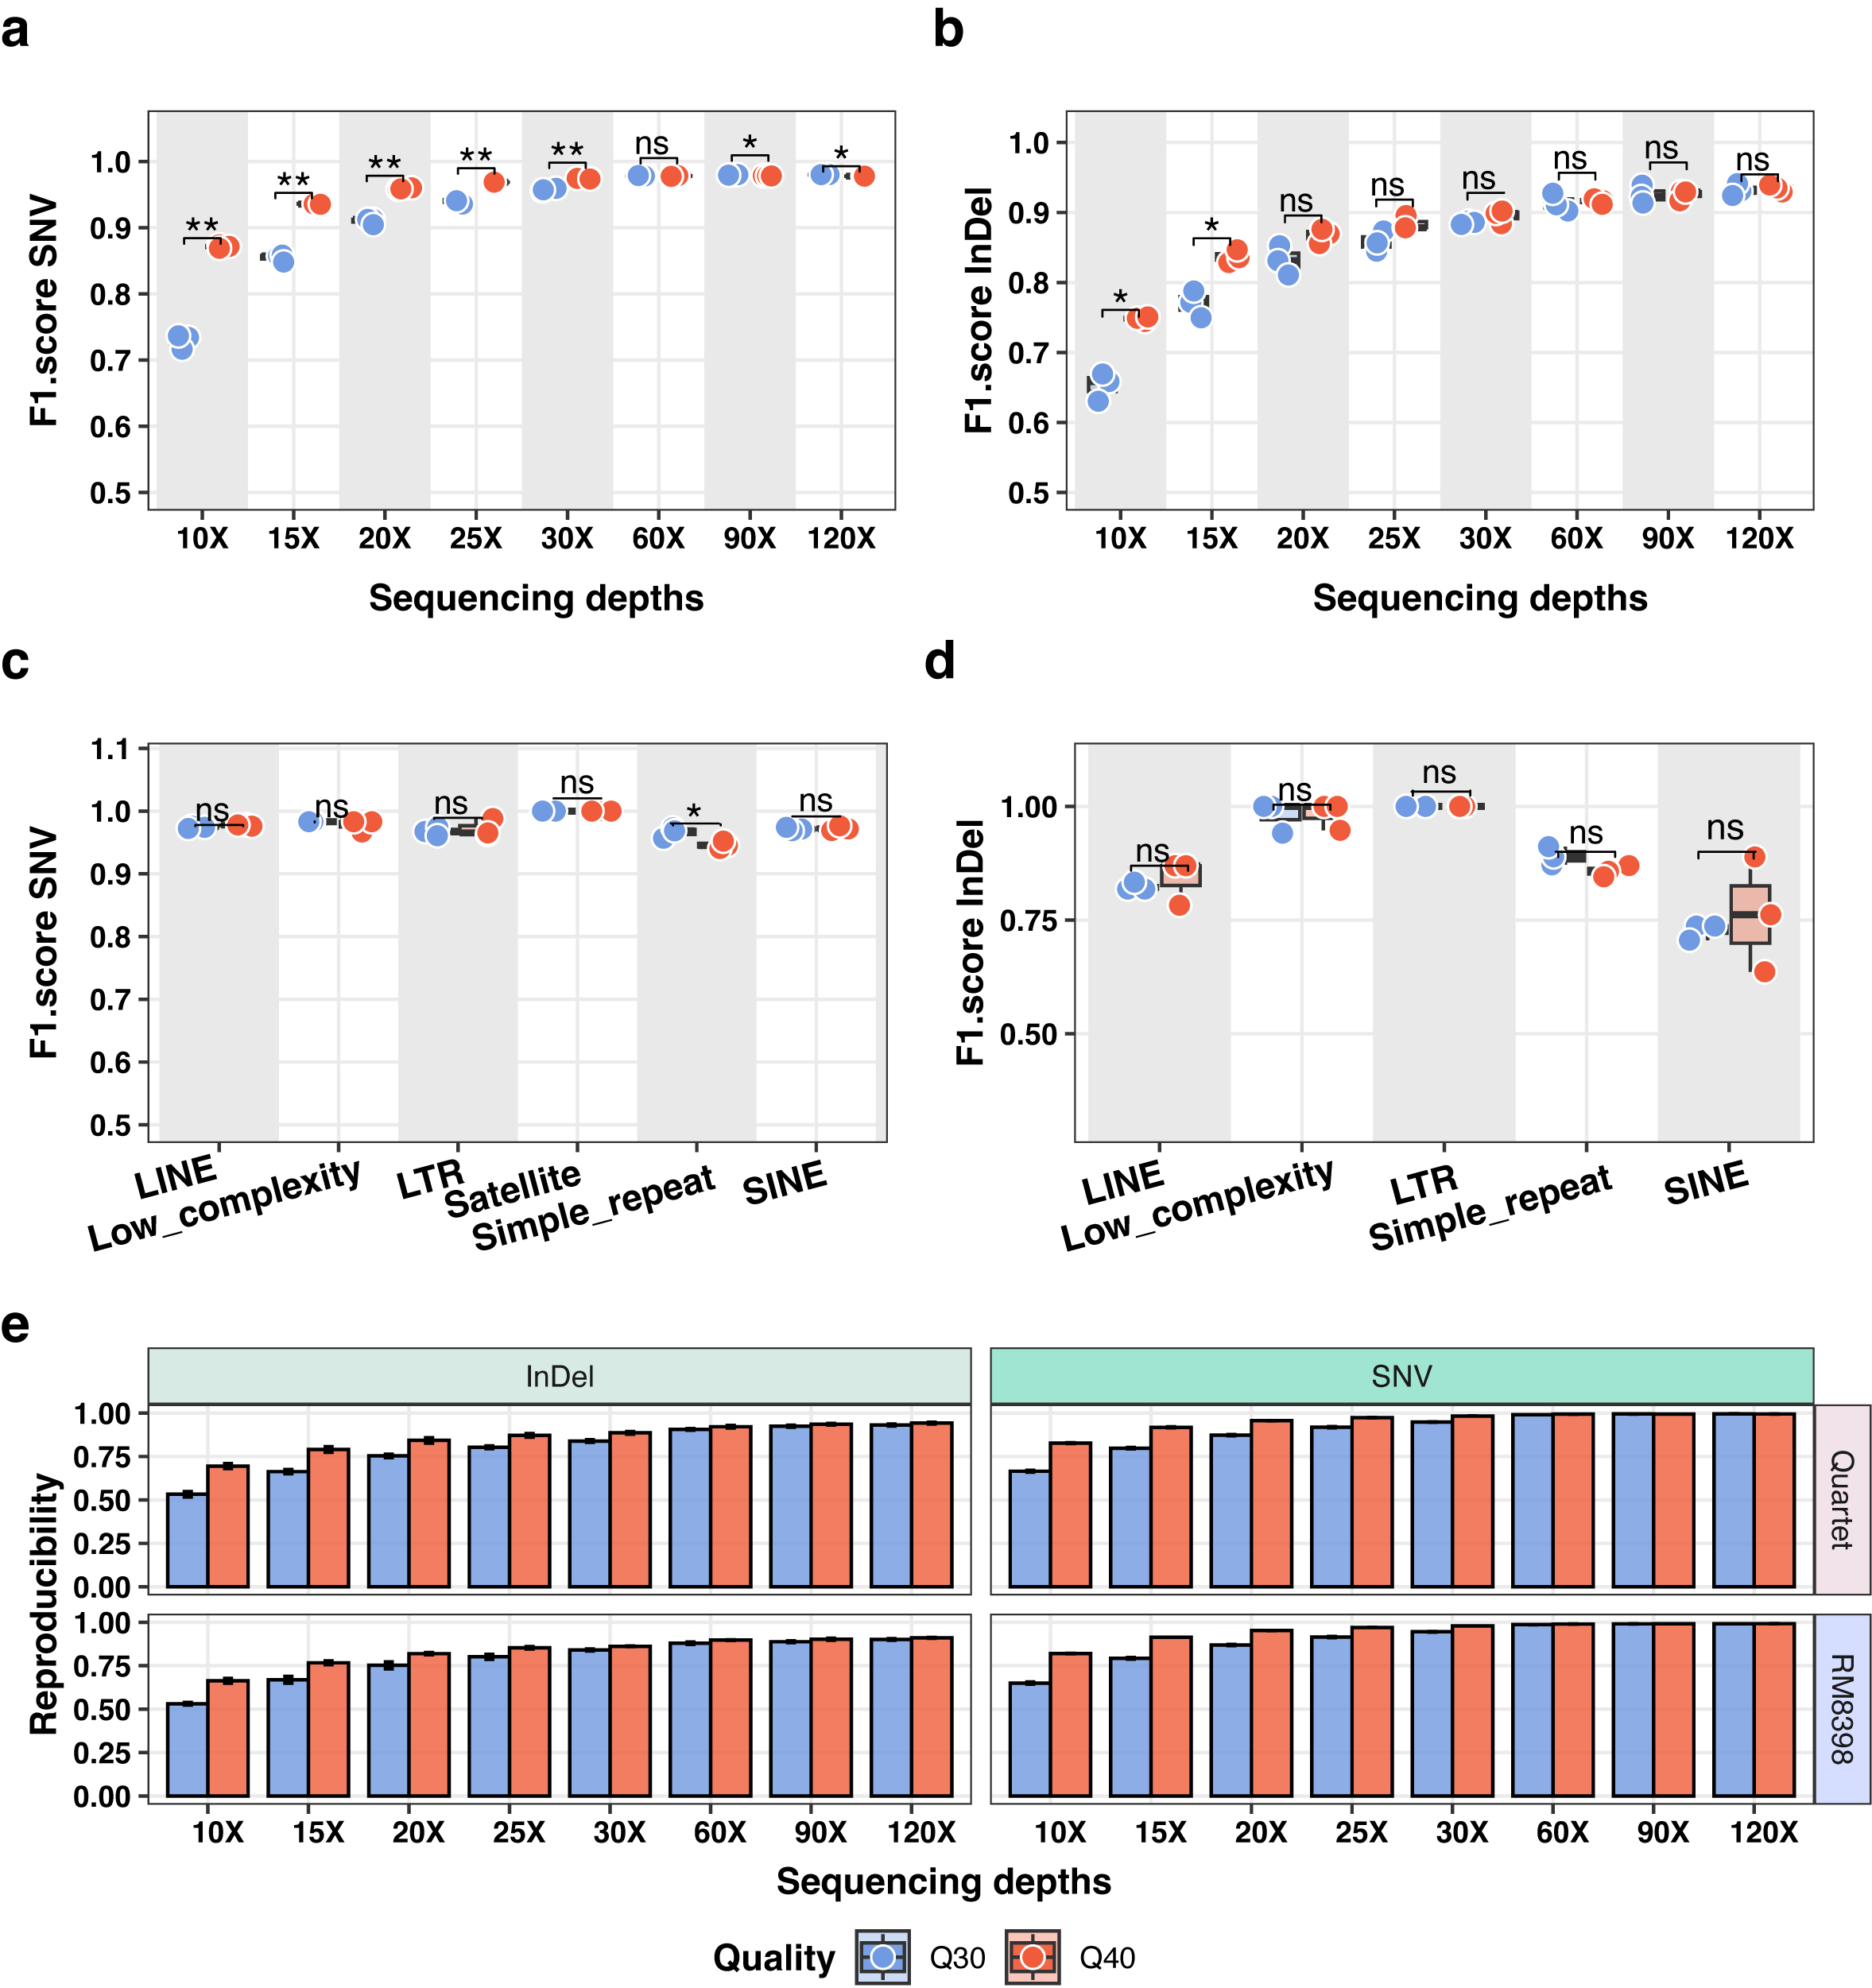


**Figure S1.** **Extended analysis of germline variant calling performance for sample RM8398 and reproducibility (Q30 *vs.* Q40).** **a, b)** F1 score for RM8398 germline variant detection in high-confidence genomic regions at different sequencing depths. **c, d)** F1 score for RM8398 germline variant detection in repeat regions. **e)** Reproducibility of germline variant detection for RM8398 and Quartet DNA reference materials.

**Figure S2. Extended analysis of somatic variant calling performance (Q30 *vs.* Q40).**


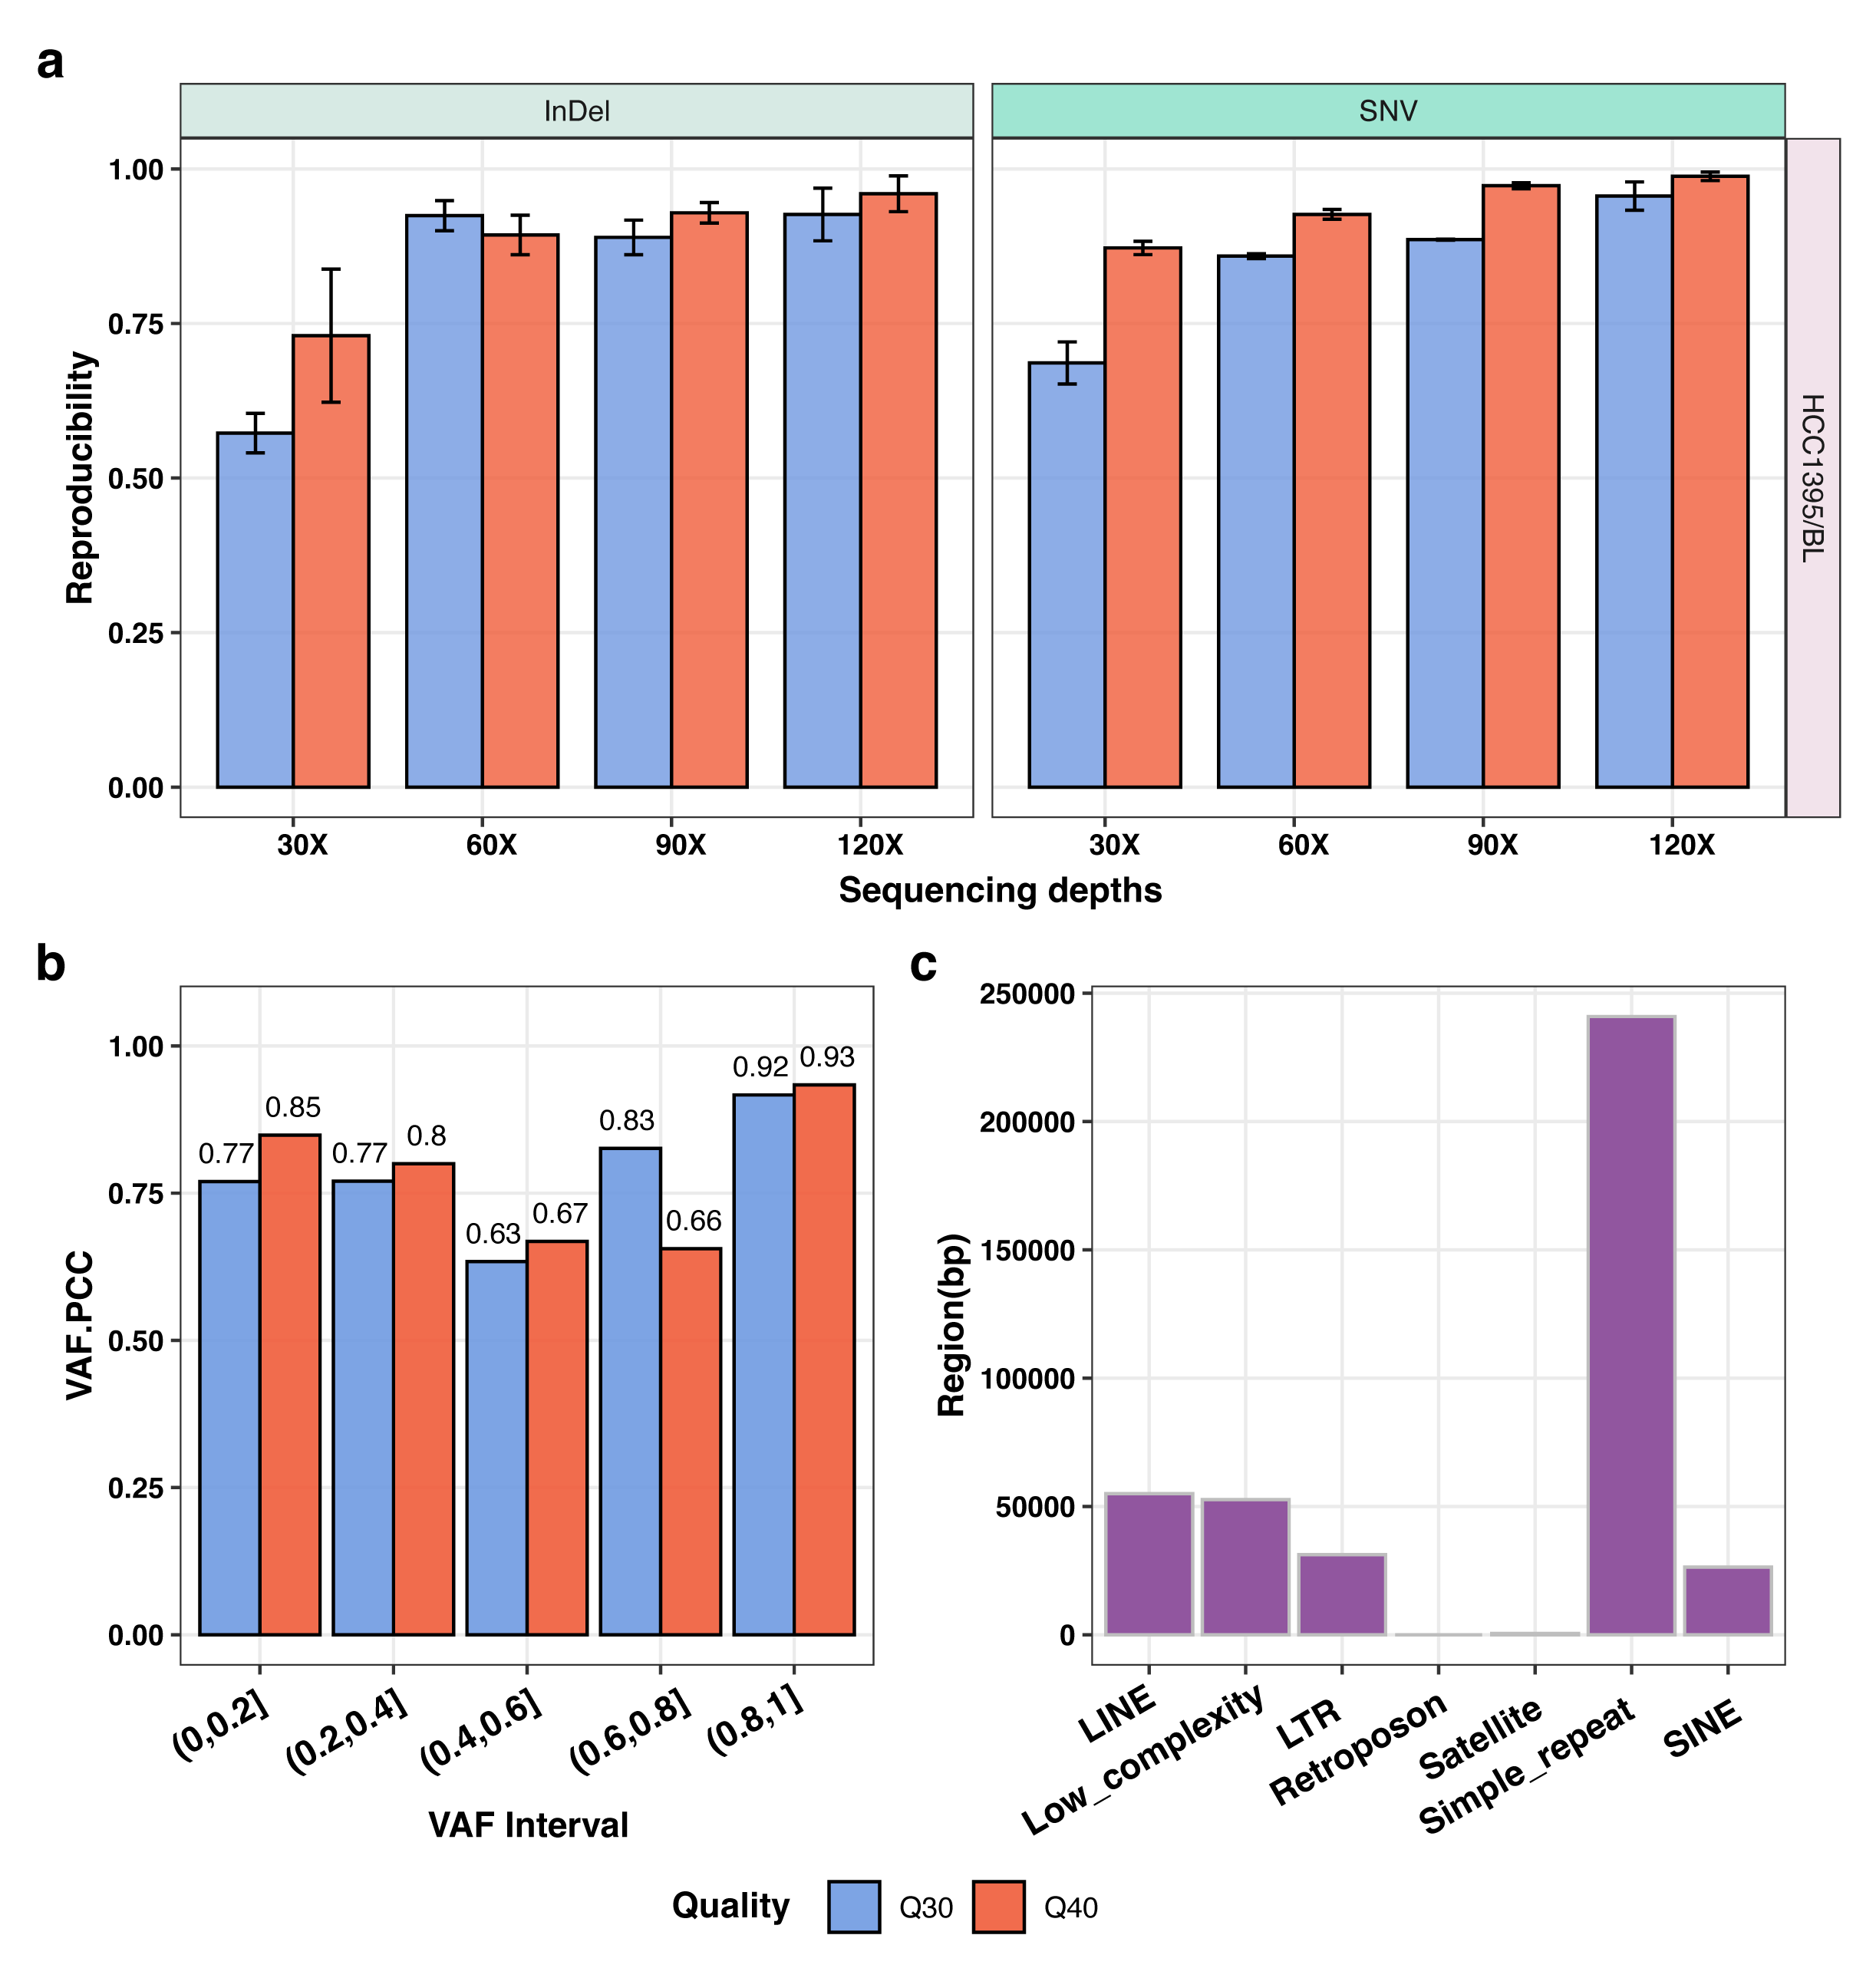


**Figure S2.** **Extended analysis of somatic variant calling performance (Q30 *vs.* Q40).** **a)** Reproducibility of somatic variant detection in HCC1395/BL DNA reference material. **b)** Pearson correlation coefficient (PCC) of variant allele frequency (VAF) between true positive samples and reference datasets across VAF intervals. **c)** Distribution of repetitive regions in exon capture regions.

**Figure S3. Performance of different types of somatic CNVs at different sequencing depths (Q30 *vs.* Q40).**

**
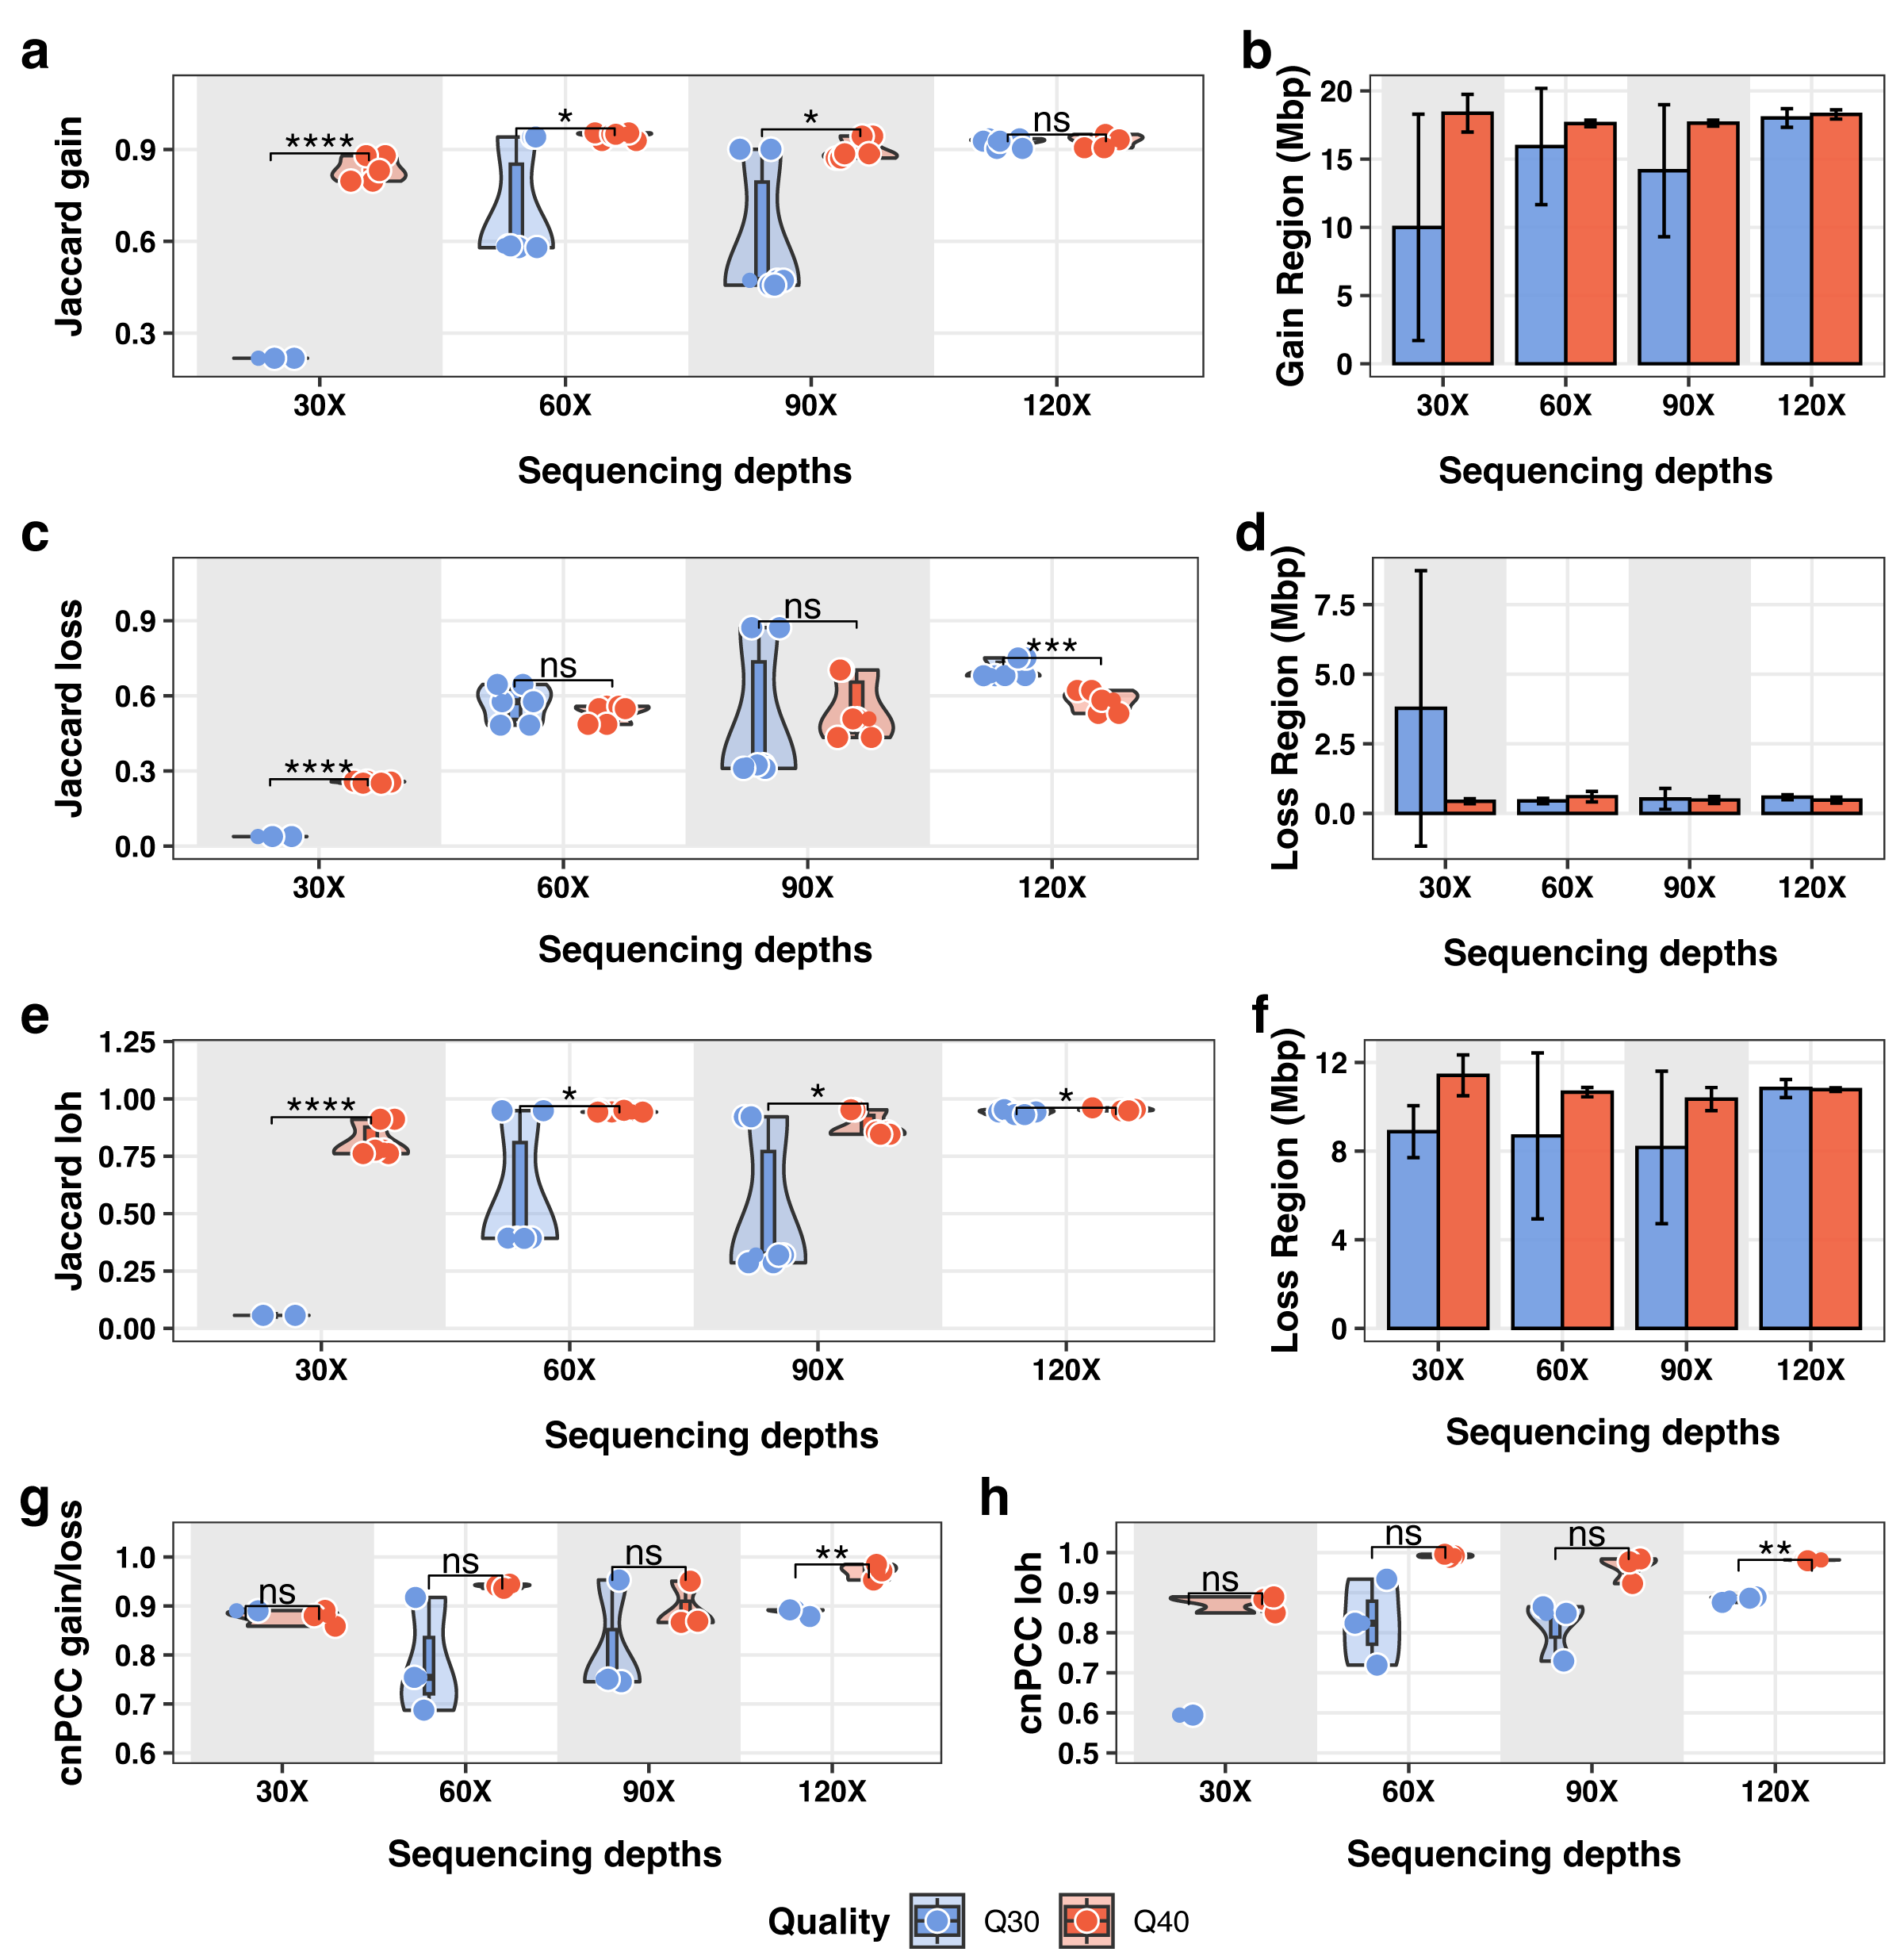
**

**Figure S3. Performance of different types of somatic CNVs at different sequencing depths (Q30 *vs.* Q40).** **a)** Repeatability of copy number gain variation (Jaccard Index). **b)** Detection range of copy number gain variation. **c)** Repeatability of copy number loss variation (Jaccard Index). **d)** Detection range of copy number loss variation. **e)** Repeatability of loss of heterozygosity (LOH) detection. **f)** Detection range of LOH. **g, h)** Correlation of copy numbers between technical replicates (Pearson correlation coefficient, PCC).

**Figure S4. Gene expression quantification performance at different sequencing depths (Q30 *vs.* Q40).**


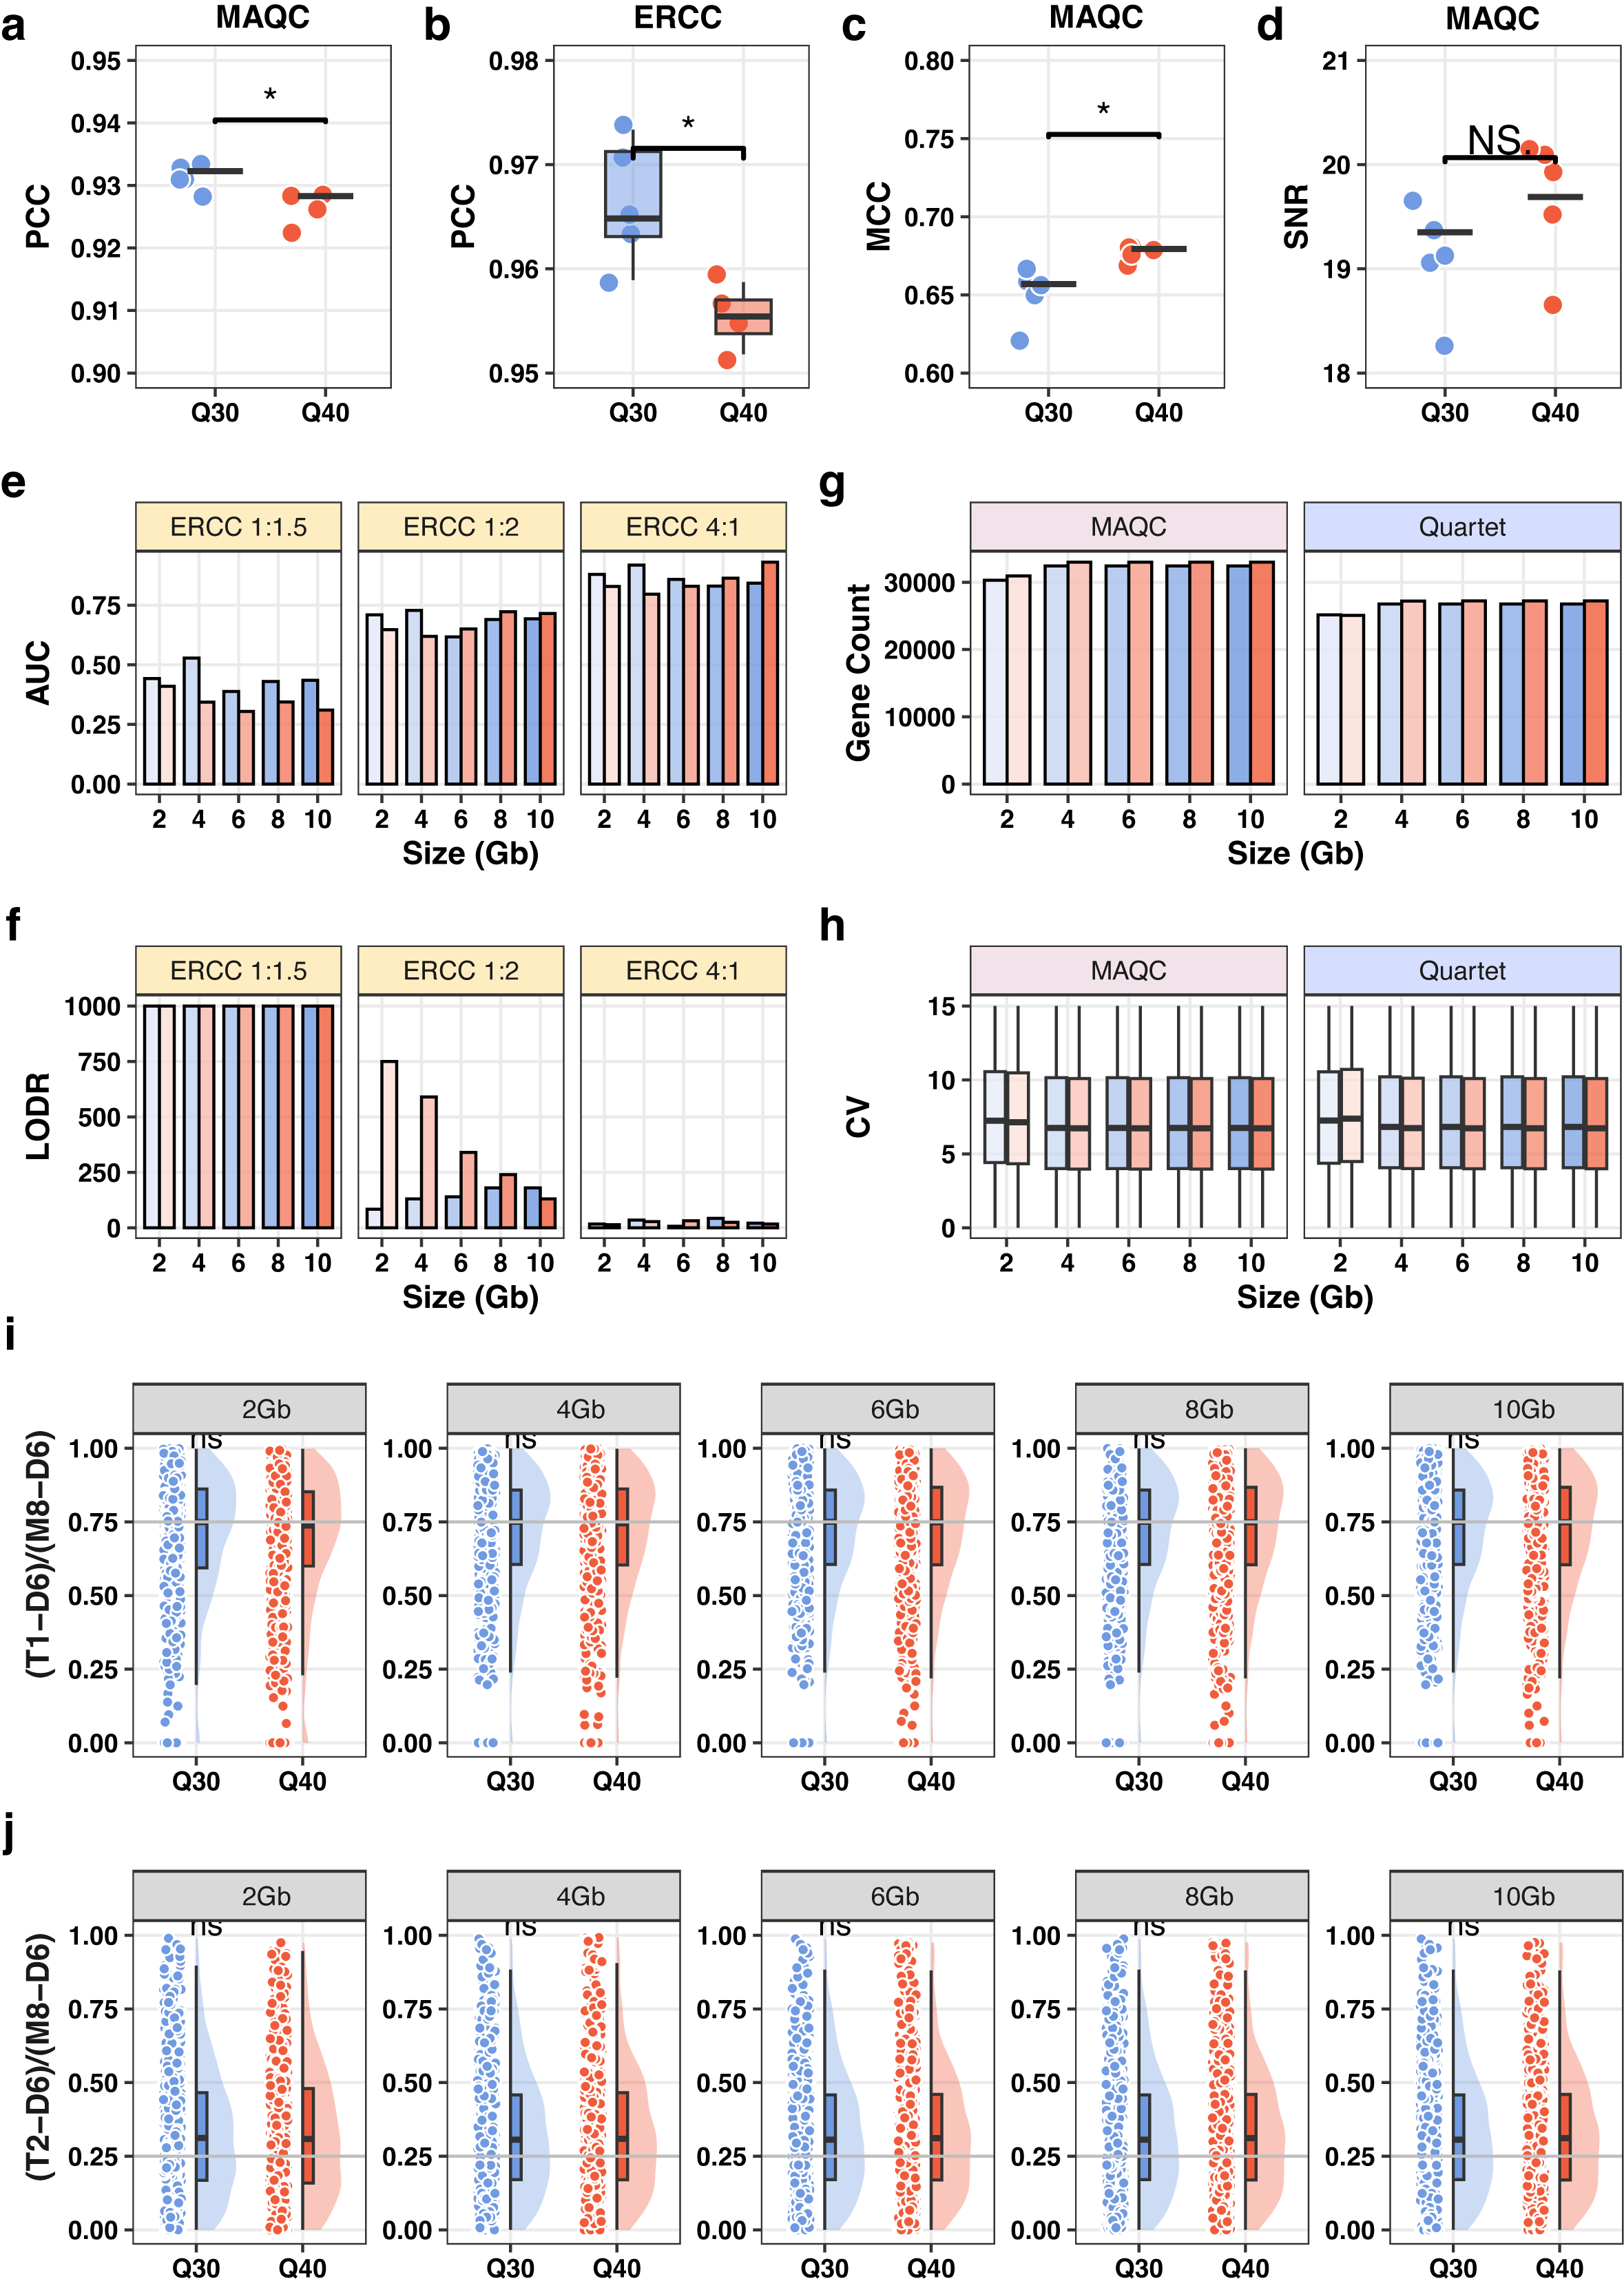


**Figure S****4. Gene expression quantification performance at different sequencing depths (Q30 *vs.* Q40).** **a)** PCC between Q30 and Q40 for MAQC reference materials. **b)** PCC between Q30 and Q40 for ERCC reference materials. **c)** MCC between Q30 and Q40 for MAQC reference materials. **d)** SNR between Q30 and Q40 for MAQC reference materials. **e)** Accuracy of gene identification (area under the curve, AUC) at each fold change. **f)** Limit of detection rate (LODR) for gene expression at each fold change. **g)** Number of quantifiable genes. **h)** CV for quantifiable genes. **i, j)** Theoretical versus actual values for T1 and T2 mixing ratios: (T1 - D6) / (M8 - D6) = 0.75; (T2 - D6) / (M8 - D6) = 0.25.

**Figure S5. Quartet-based SNR at different sequencing depths (Q30 *vs.* Q40).**


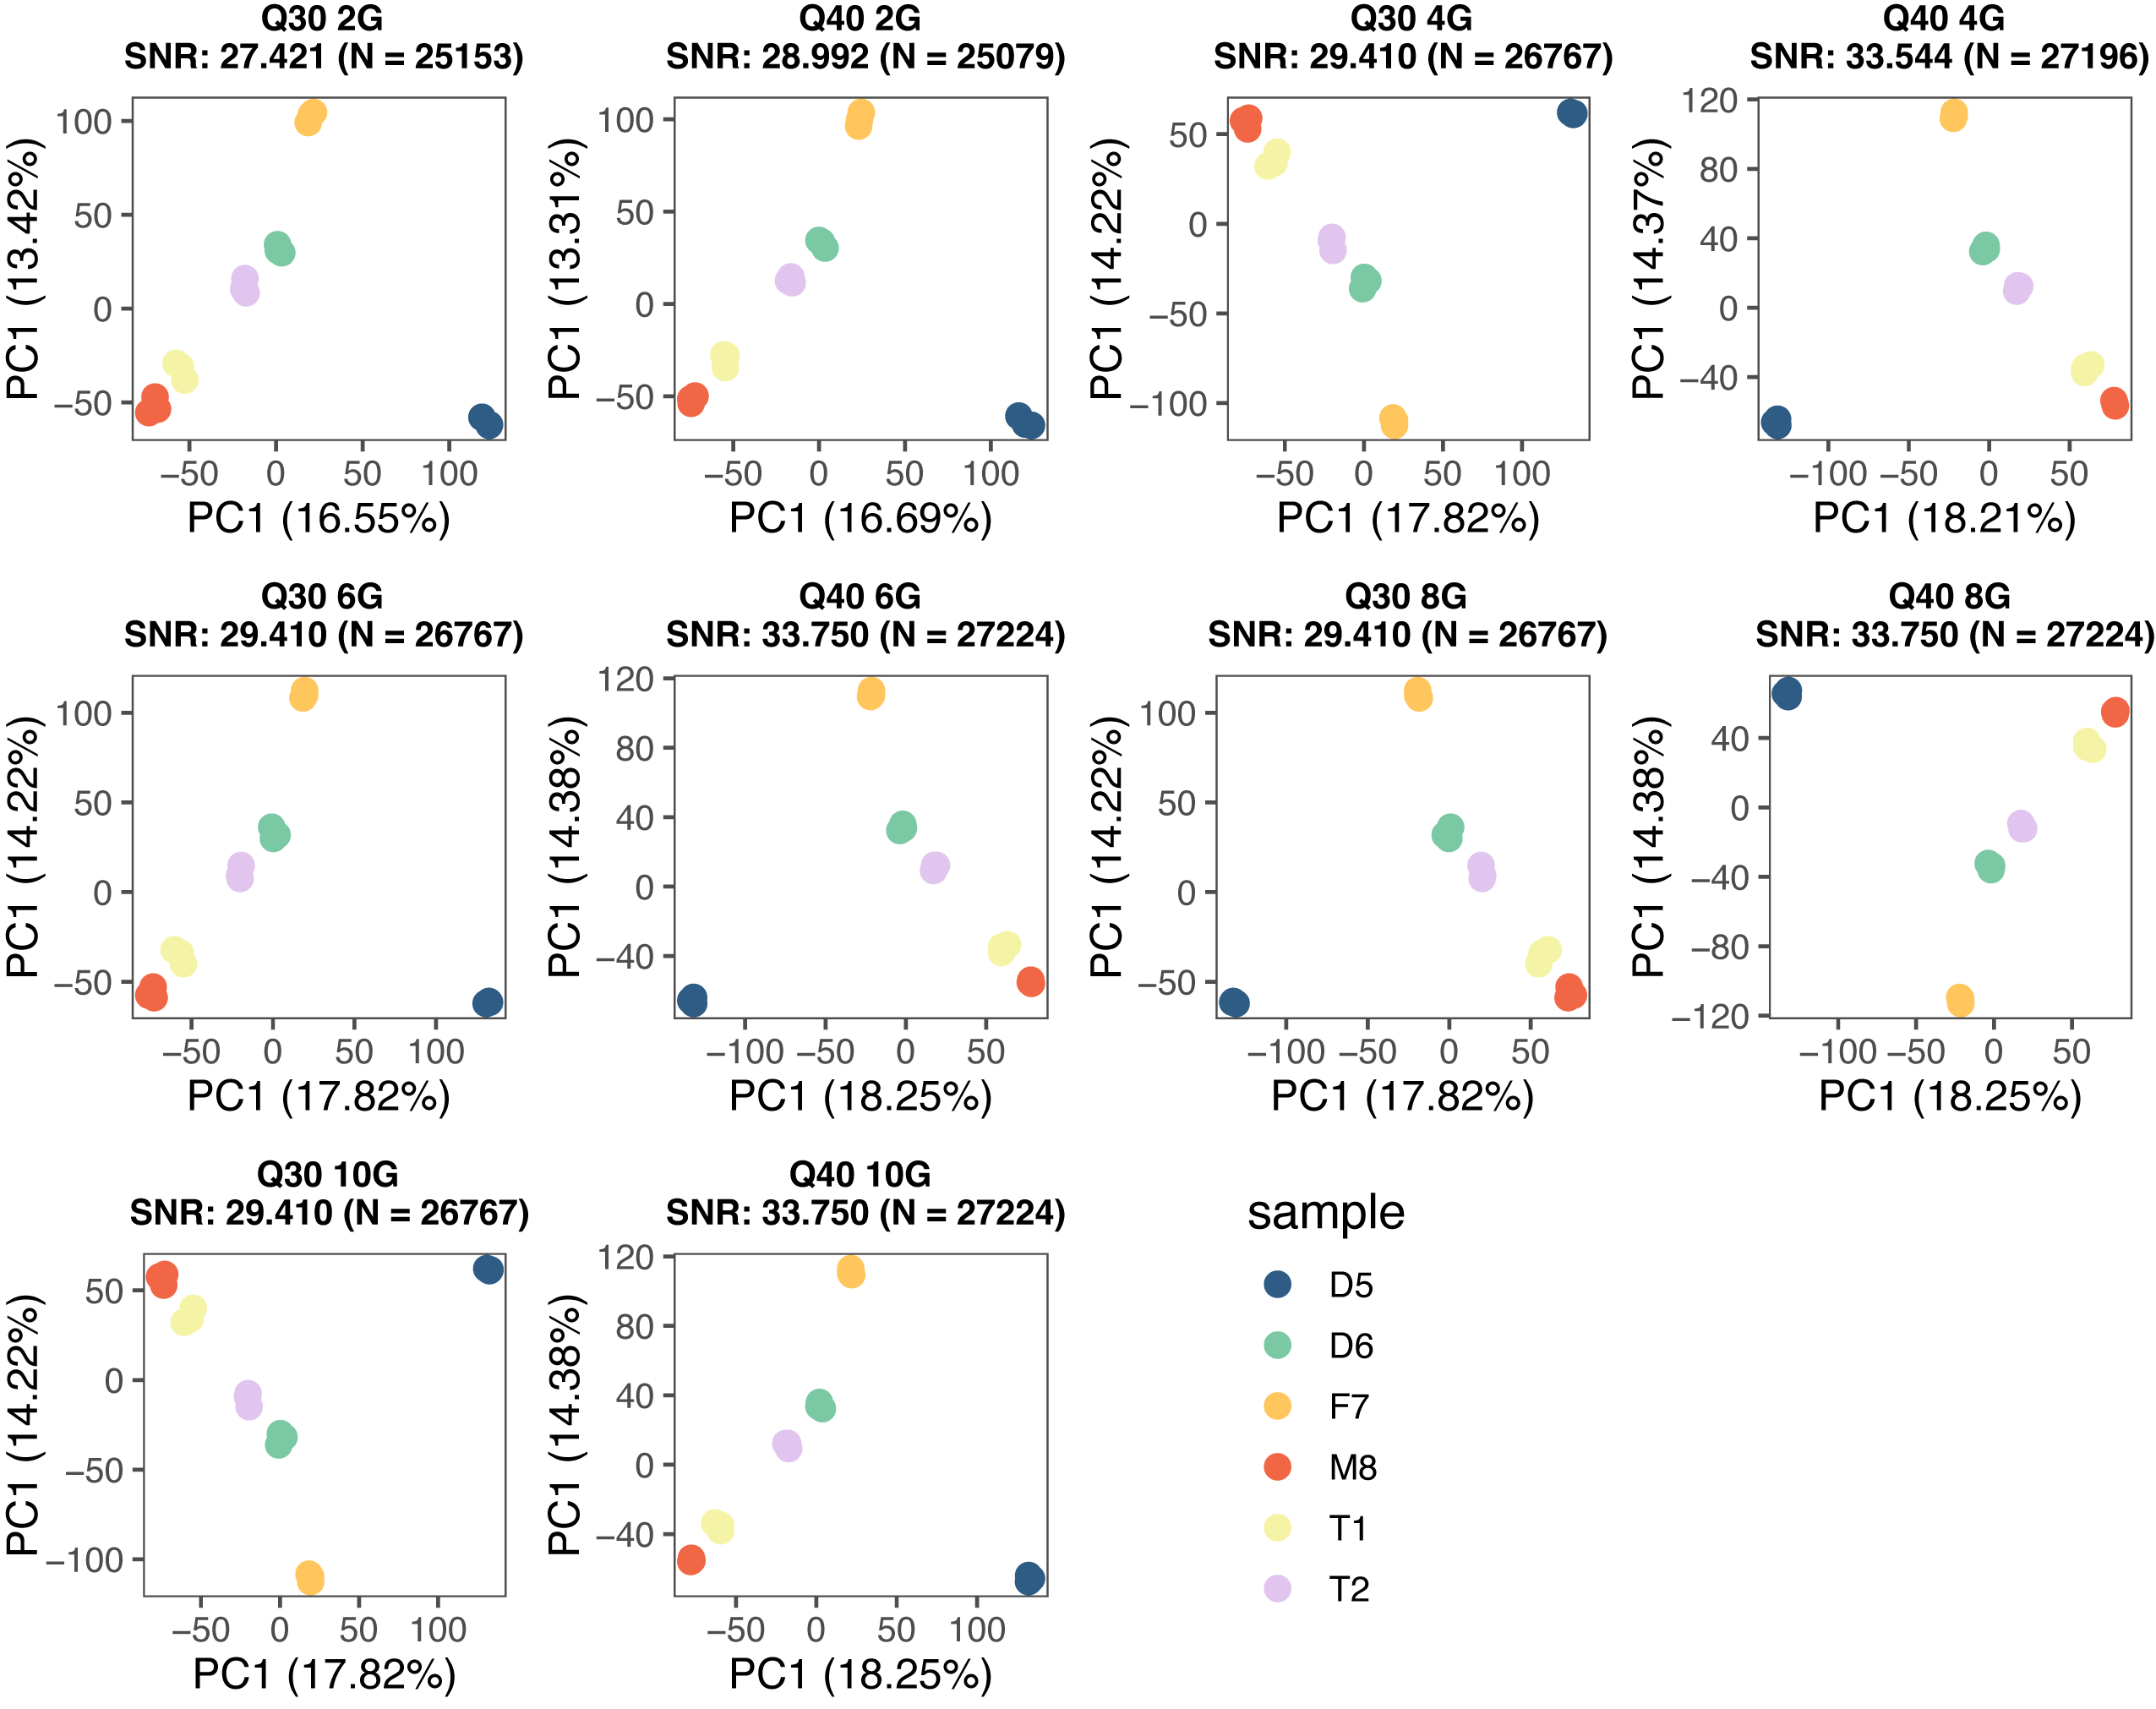


**Figure S5.** **Quartet-based SNR at different sequencing depths (Q30 *vs.* Q40).** In the principal component analysis (PCA) plot, the closer the technical replicates of the same sample and the farther the different samples are from each other, the higher the signal-to-noise ratio (SNR), indicating a stronger ability to distinguish different biological samples.

**Figure S6. Assessment metrics for variant detection and differential gene-expression analysis.**


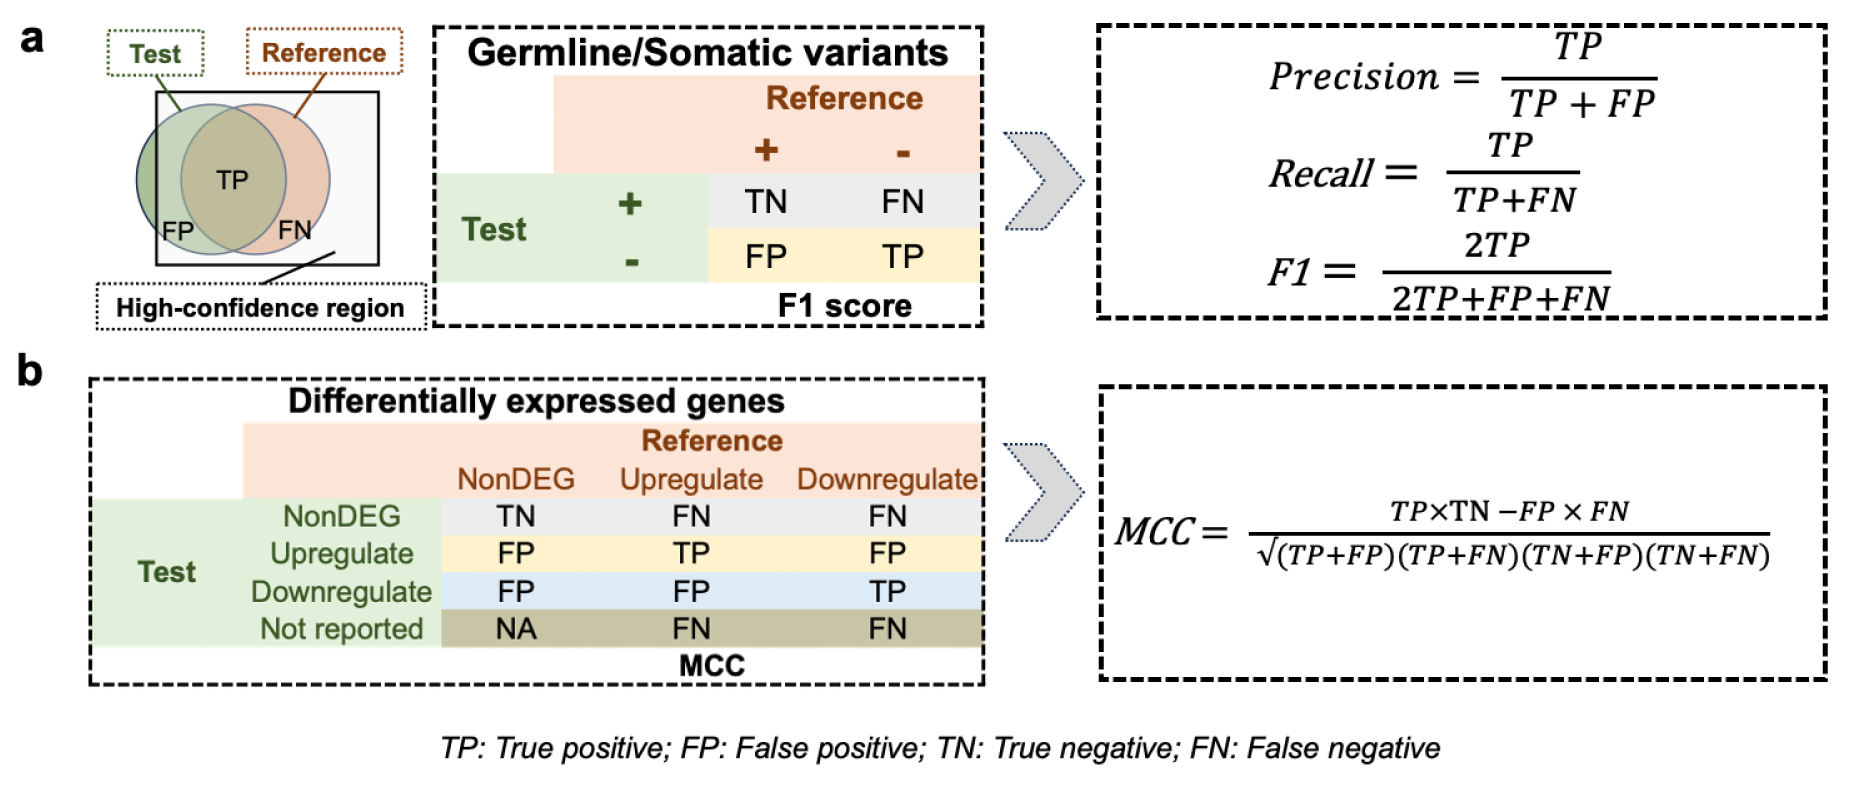


**Figure S6. Assessment metrics for variant detection and differential gene-expression analysis.** **(a)** F1 score for the accuracy of variant detection. **(b)** MCC for the accuracy of differential gene-expression assessment.
